# Supplementary material for: A combined micromagnetic-microfluidic device for rapid capture and culture of rare circulating tumor cells
Source: Royal Society of Chemistry journal article supplement (doi:10.1039/c2lc40072c), 2012-01-01
Supplement: c2lc40072c.pdf [file c2lc40072c.pdf]

## **Supplementary Material (ESI) for Lab on a Chip**

### **A microfluidic device for rapid capture and culture of rare circulating tumor cells**

Joo H. Kang, Silva Krause, Heather Tobin, Akiko Mammoto, Mathumai Kanapathipillai and Donald E. Ingber

#### **SUPPLEMENTARY FIGURE LEGENDS**

**Fig. S1.** Graph showing measured drag velocity ( $v$ ) and estimated magnetic forces ( $F$ ) of magnetic beads pulled along the  $y$ -axis shown while flowing through the microchannel along the  $x$ -axis in **Fig. 2d**, as measured using a fast camera. The average drag velocity was  $1.92 \pm 0.06$  mm/sec.

**Fig. S2.** Schematic diagram of the microfluidic channel that links the inlet to the main microfluidic channel at an angle of 60 degrees. The drag velocity of a cell bound to a magnetic bead was estimated, and computational fluid dynamic simulation revealed that the initial position of the cell will be confined within the lower 240  $\mu\text{m}$  of the main channel (300  $\mu\text{m}$  wide) closest to the magnet and dead-end side chambers. A magnetic bead-bound cell experiences the combined force vector (red) that is composed of the magnetic force ( $F_{\text{mag}}$ ) and the force driven by flow ( $F_{\text{flow}}$ ), and an estimated transverse movement of  $\sim 60$   $\mu\text{m}$  while traveling through the angled inlet conduit.

**Fig. S3. (a)** Fluorescence micrograph showing magnetically collected cells stained in the dead-end side chamber with calceinAM (green) and ethidium homodimer-1 (red) to live and

dead cells, respectively. Note that all collected cells were found to be viable. **(b)** Graph showing that M6C tumor cells consistently exhibited greater than 90% viability whether measured immediately after trypsinization (1), after magnetic isolation and collection in the side chambers of the device (2), or treatment of the RBC lysis solution containing ammonium chloride and 0.1 % BSA (3).
