# Supplementary figures and images for: A combined micromagnetic-microfluidic device for rapid capture and culture of rare circulating tumor cells
Source: Royal Society of Chemistry journal article supplement (doi:10.1039/c2lc40072c), 2012-01-01

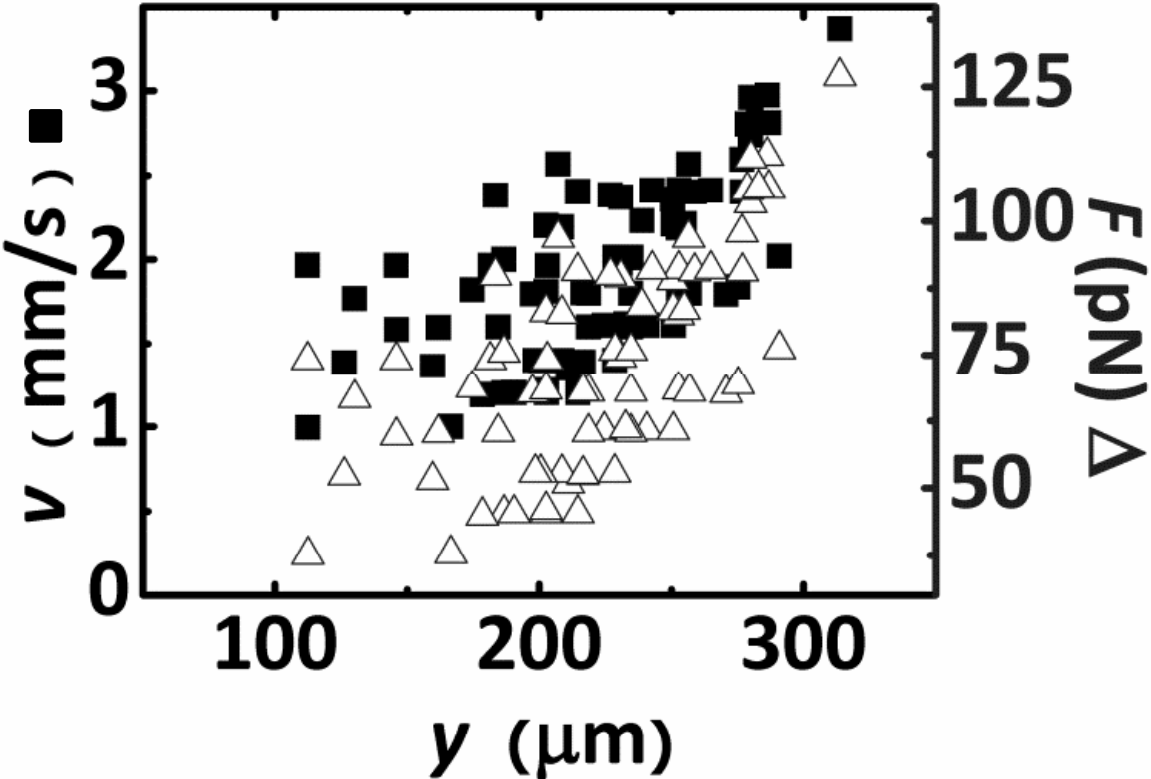

Fig. S1

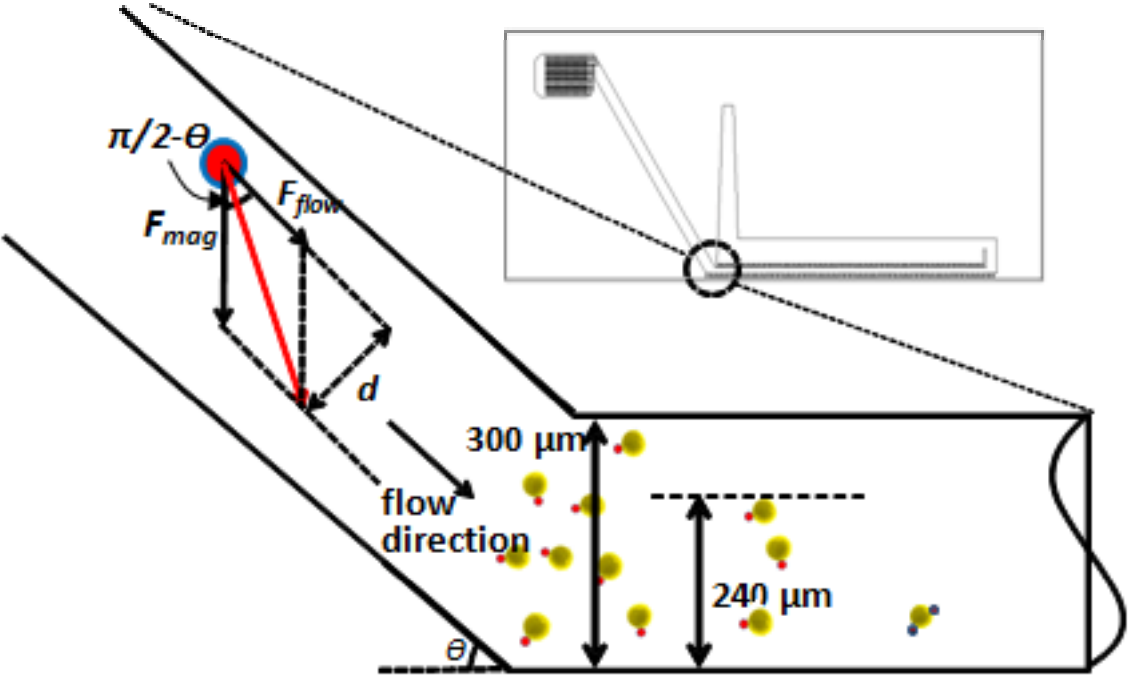

Fig. S2

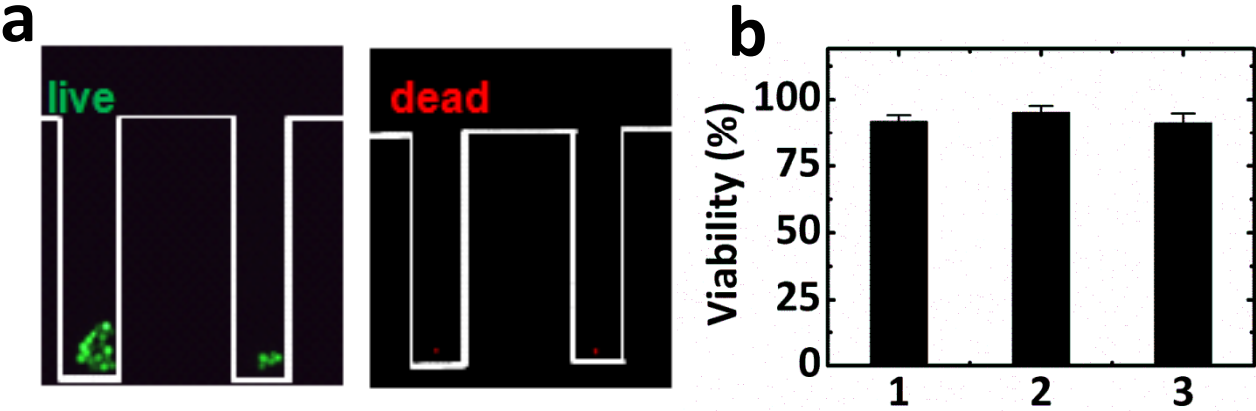

**Fig. S3**

Supplement: c2lc40072c_2.pdf [file c2lc40072c_2.pdf]
